# Supplementary material for: Protective Effect of Memantine on Bergmann Glia and Purkinje Cells Morphology in Optogenetic Model of Neurodegeneration in Mice
Source: MDPI journal article supplement (doi:10.3390/ijms22157822), 2021-07-22
Supplement: s1 [file s1]

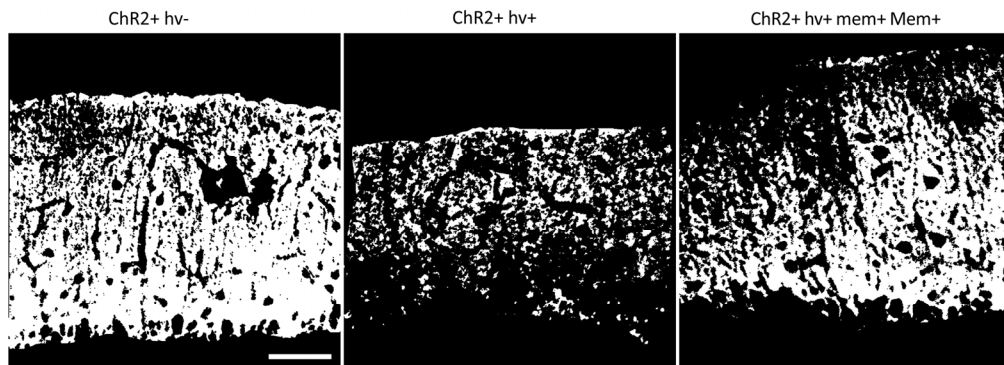

**Figure S1.** Contrast-enhanced microphotograph of the anti-EAAT1-labeled areas. Images contain digitally traced anti-EAAT1 fluorescence signals generated with Fiji software.
